# Supplementary material
Source: MDPI journal article supplement (https://www.mdpi.com/2413-8851/5/1/21)
Supplement: s1 [file s1]

## Sheet: IWAs
Element_ID	Element_Name	IWA_ID	IWA_Title	social	social2	social3
4.A.1.a.1	Getting Information	4.A.1.a.1.I01	Study details of artistic productions.
4.A.1.a.1	Getting Information	4.A.1.a.1.I02	Read documents or materials to inform work processes.
4.A.1.a.1	Getting Information	4.A.1.a.1.I03	Investigate criminal or legal matters.	x
4.A.1.a.1	Getting Information	4.A.1.a.1.I04	Gather information from physical or electronic sources.
4.A.1.a.1	Getting Information	4.A.1.a.1.I05	Consult legal materials or public records.
4.A.1.a.1	Getting Information	4.A.1.a.1.I06	Gather data about operational or development activities.
4.A.1.a.1	Getting Information	4.A.1.a.1.I07	Obtain information about goods or services.
4.A.1.a.1	Getting Information	4.A.1.a.1.I08	Research issues related to earth sciences.
4.A.1.a.1	Getting Information	4.A.1.a.1.I09	Research organizational behavior, processes, or performance.	x
4.A.1.a.1	Getting Information	4.A.1.a.1.I10	Investigate the environmental impact of industrial or development activities.	x
4.A.1.a.1	Getting Information	4.A.1.a.1.I11	Gather information for news stories.
4.A.1.a.1	Getting Information	4.A.1.a.1.I12	Collect information about patients or clients.
4.A.1.a.1	Getting Information	4.A.1.a.1.I13	Research agricultural processes or practices.
4.A.1.a.1	Getting Information	4.A.1.a.1.I14	Collect data about consumer needs or opinions.
4.A.1.a.1	Getting Information	4.A.1.a.1.I15	Investigate individuals' background, behavior, or activities.	x
4.A.1.a.1	Getting Information	4.A.1.a.1.I16	Research biological or ecological phenomena.
4.A.1.a.1	Getting Information	4.A.1.a.1.I17	Obtain formal documentation or authorization.
4.A.1.a.1	Getting Information	4.A.1.a.1.I18	Research historical or social issues.
4.A.1.a.1	Getting Information	4.A.1.a.1.I19	Research healthcare issues.
4.A.1.a.1	Getting Information	4.A.1.a.1.I20	Research technology designs or applications.
4.A.1.a.1	Getting Information	4.A.1.a.1.I21	Investigate incidents or accidents.
4.A.1.a.1	Getting Information	4.A.1.a.1.I22	Investigate organizational or operational problems.	x
4.A.1.a.1	Getting Information	4.A.1.a.1.I23	Interview people to obtain information.	x
4.A.1.a.2	Monitor Processes, Materials, or Surroundings	4.A.1.a.2.I01	Monitor equipment operation.
4.A.1.a.2	Monitor Processes, Materials, or Surroundings	4.A.1.a.2.I02	Monitor operations to ensure adequate performance.
4.A.1.a.2	Monitor Processes, Materials, or Surroundings	4.A.1.a.2.I03	Monitor financial data or activities.
4.A.1.a.2	Monitor Processes, Materials, or Surroundings	4.A.1.a.2.I04	Monitor traffic conditions.
4.A.1.a.2	Monitor Processes, Materials, or Surroundings	4.A.1.a.2.I05	Monitor health conditions of humans or animals.
4.A.1.a.2	Monitor Processes, Materials, or Surroundings	4.A.1.a.2.I06	Monitor individual behavior or performance.
4.A.1.a.2	Monitor Processes, Materials, or Surroundings	4.A.1.a.2.I07	Monitor safety or security of work areas, facilities, or properties.
4.A.1.a.2	Monitor Processes, Materials, or Surroundings	4.A.1.a.2.I08	Monitor external affairs, trends, or events.
4.A.1.a.2	Monitor Processes, Materials, or Surroundings	4.A.1.a.2.I09	Monitor environmental conditions.
4.A.1.a.2	Monitor Processes, Materials, or Surroundings	4.A.1.a.2.I10	Monitor operation of computer or information technologies.
4.A.1.a.2	Monitor Processes, Materials, or Surroundings	4.A.1.a.2.I11	Monitor operations to ensure compliance with regulations or standards.
4.A.1.b.1	Identifying Objects, Actions, and Events	4.A.1.b.1.I01	Mark materials or objects for identification.
4.A.1.b.1	Identifying Objects, Actions, and Events	4.A.1.b.1.I02	Identify business or organizational opportunities.
4.A.1.b.2	Inspecting Equipment, Structures, or Material	4.A.1.b.2.I01	Administer diagnostic tests to assess patient health.
4.A.1.b.2	Inspecting Equipment, Structures, or Material	4.A.1.b.2.I02	Evaluate green technologies or processes.
4.A.1.b.2	Inspecting Equipment, Structures, or Material	4.A.1.b.2.I03	Test characteristics of materials or products.
4.A.1.b.2	Inspecting Equipment, Structures, or Material	4.A.1.b.2.I04	Inspect vehicles.
4.A.1.b.2	Inspecting Equipment, Structures, or Material	4.A.1.b.2.I05	Inspect facilities or equipment.	x
4.A.1.b.2	Inspecting Equipment, Structures, or Material	4.A.1.b.2.I06	Inspect completed work or finished products.	x
4.A.1.b.2	Inspecting Equipment, Structures, or Material	4.A.1.b.2.I07	Inspect commercial, industrial, or production systems or equipment.	x
4.A.1.b.2	Inspecting Equipment, Structures, or Material	4.A.1.b.2.I08	Test performance of computer or information systems.
4.A.1.b.2	Inspecting Equipment, Structures, or Material	4.A.1.b.2.I09	Examine people or animals to assess health conditions or physical characteristics.	x
4.A.1.b.2	Inspecting Equipment, Structures, or Material	4.A.1.b.2.I10	Inspect characteristics or conditions of materials or products.
4.A.1.b.2	Inspecting Equipment, Structures, or Material	4.A.1.b.2.I11	Test sites or materials for environmental hazards.
4.A.1.b.2	Inspecting Equipment, Structures, or Material	4.A.1.b.2.I12	Test performance of equipment or systems.
4.A.1.b.3	Estimating the Quantifiable Characteristics of Products, Events, or Information	4.A.1.b.3.I01	Measure physical characteristics of materials, products, or equipment.			x
4.A.1.b.3	Estimating the Quantifiable Characteristics of Products, Events, or Information	4.A.1.b.3.I02	Estimate project development or operational costs.			x
4.A.1.b.3	Estimating the Quantifiable Characteristics of Products, Events, or Information	4.A.1.b.3.I03	Calculate financial data.			x
4.A.1.b.3	Estimating the Quantifiable Characteristics of Products, Events, or Information	4.A.1.b.3.I04	Assess characteristics of land or property.			x
4.A.1.b.3	Estimating the Quantifiable Characteristics of Products, Events, or Information	4.A.1.b.3.I05	Take physical measurements of patients or clients.	x		x
4.A.2.a.1	Judging the Qualities of Things, Services, or People	4.A.2.a.1.I01	Assess living, work, or social needs or status of individuals or communities.	x		x
4.A.2.a.1	Judging the Qualities of Things, Services, or People	4.A.2.a.1.I02	Evaluate programs, practices, or processes.			x
4.A.2.a.1	Judging the Qualities of Things, Services, or People	4.A.2.a.1.I03	Assess student capabilities, needs, or performance.			x
4.A.2.a.1	Judging the Qualities of Things, Services, or People	4.A.2.a.1.I04	Evaluate personnel capabilities or performance.			x
4.A.2.a.1	Judging the Qualities of Things, Services, or People	4.A.2.a.1.I05	Evaluate production inputs or outputs.			x
4.A.2.a.1	Judging the Qualities of Things, Services, or People	4.A.2.a.1.I06	Evaluate patient or client condition or treatment options.			x
4.A.2.a.1	Judging the Qualities of Things, Services, or People	4.A.2.a.1.I07	Evaluate the characteristics, usefulness, or performance of products or technologies.			x
4.A.2.a.1	Judging the Qualities of Things, Services, or People	4.A.2.a.1.I08	Evaluate scholarly work.			x
4.A.2.a.1	Judging the Qualities of Things, Services, or People	4.A.2.a.1.I09	Evaluate condition of financial assets, property, or other resources.			x
4.A.2.a.1	Judging the Qualities of Things, Services, or People	4.A.2.a.1.I10	Evaluate project feasibility.			x
4.A.2.a.2	Processing Information	4.A.2.a.2.I01	Evaluate the quality or accuracy of data.
4.A.2.a.2	Processing Information	4.A.2.a.2.I02	Sort materials or products.
4.A.2.a.2	Processing Information	4.A.2.a.2.I03	Compile records, documentation, or other data.
4.A.2.a.2	Processing Information	4.A.2.a.2.I04	Reconcile financial data.
4.A.2.a.2	Processing Information	4.A.2.a.2.I05	Verify personal information.
4.A.2.a.3	Evaluating Information to Determine Compliance with Standards	4.A.2.a.3.I01	Examine materials or documentation for accuracy or compliance.
4.A.2.a.3	Evaluating Information to Determine Compliance with Standards	4.A.2.a.3.I02	Assess compliance with environmental standards or regulations.
4.A.2.a.3	Evaluating Information to Determine Compliance with Standards	4.A.2.a.3.I03	Examine financial activities, operations, or systems.
4.A.2.a.3	Evaluating Information to Determine Compliance with Standards	4.A.2.a.3.I04	Follow standard healthcare safety procedures to protect patient and staff members.
4.A.2.a.4	Analyzing Data or Information	4.A.2.a.4.I01	Analyze environmental or geospatial data.			x
4.A.2.a.4	Analyzing Data or Information	4.A.2.a.4.I02	Analyze market or industry conditions.			x
4.A.2.a.4	Analyzing Data or Information	4.A.2.a.4.I03	Analyze business or financial risks.			x
4.A.2.a.4	Analyzing Data or Information	4.A.2.a.4.I04	Analyze scientific or applied data using mathematical principles.			x
4.A.2.a.4	Analyzing Data or Information	4.A.2.a.4.I05	Evaluate designs, specifications, or other technical data.			x
4.A.2.a.4	Analyzing Data or Information	4.A.2.a.4.I06	Analyze health or medical data.			x
4.A.2.a.4	Analyzing Data or Information	4.A.2.a.4.I07	Analyze data to improve operations.			x
4.A.2.a.4	Analyzing Data or Information	4.A.2.a.4.I08	Research laws, precedents, or other legal data.			x
4.A.2.a.4	Analyzing Data or Information	4.A.2.a.4.I09	Assess characteristics or impacts of regulations or policies.			x
4.A.2.a.4	Analyzing Data or Information	4.A.2.a.4.I10	Analyze biological or chemical substances or related data.			x
4.A.2.a.4	Analyzing Data or Information	4.A.2.a.4.I11	Analyze business or financial data.			x
4.A.2.a.4	Analyzing Data or Information	4.A.2.a.4.I12	Analyze performance of systems or equipment.			x
4.A.2.b.1	Making Decisions and Solving Problems	4.A.2.b.1.I01	Determine values or prices of goods or services.			x
4.A.2.b.1	Making Decisions and Solving Problems	4.A.2.b.1.I02	Diagnose system or equipment problems.			x
4.A.2.b.1	Making Decisions and Solving Problems	4.A.2.b.1.I03	Authorize business activities or transactions.			x
4.A.2.b.1	Making Decisions and Solving Problems	4.A.2.b.1.I04	Determine operational methods or procedures.			x
4.A.2.b.1	Making Decisions and Solving Problems	4.A.2.b.1.I05	Make legal decisions.			x
4.A.2.b.1	Making Decisions and Solving Problems	4.A.2.b.1.I06	Diagnose health conditions or disorders.	x		x
4.A.2.b.1	Making Decisions and Solving Problems	4.A.2.b.1.I07	Edit written materials or documents.			x
4.A.2.b.1	Making Decisions and Solving Problems	4.A.2.b.1.I08	Determine resource needs of projects or operations.			x
4.A.2.b.1	Making Decisions and Solving Problems	4.A.2.b.1.I09	Implement procedures or processes.	x		x
4.A.2.b.1	Making Decisions and Solving Problems	4.A.2.b.1.I10	Select materials or equipment for operations or projects.			x
4.A.2.b.1	Making Decisions and Solving Problems	4.A.2.b.1.I11	Alter audio or video recordings.			x
4.A.2.b.2	Thinking Creatively	4.A.2.b.2.I01	Develop patient or client care or treatment plans.			x
4.A.2.b.2	Thinking Creatively	4.A.2.b.2.I02	Design computer or information systems or applications.			x
4.A.2.b.2	Thinking Creatively	4.A.2.b.2.I03	Develop business or marketing plans.			x
4.A.2.b.2	Thinking Creatively	4.A.2.b.2.I04	Develop recipes or menus.			x
4.A.2.b.2	Thinking Creatively	4.A.2.b.2.I05	Develop safety standards, policies, or procedures.			x
4.A.2.b.2	Thinking Creatively	4.A.2.b.2.I06	Design databases.			x
4.A.2.b.2	Thinking Creatively	4.A.2.b.2.I07	Develop technical specifications for products or operations.			x
4.A.2.b.2	Thinking Creatively	4.A.2.b.2.I08	Develop plans for managing or preserving natural resources.			x
4.A.2.b.2	Thinking Creatively	4.A.2.b.2.I09	Develop financial or business plans.			x
4.A.2.b.2	Thinking Creatively	4.A.2.b.2.I10	Develop health assessment methods or programs.			x
4.A.2.b.2	Thinking Creatively	4.A.2.b.2.I11	Design structures or facilities.			x
4.A.2.b.2	Thinking Creatively	4.A.2.b.2.I12	Develop marketing or promotional materials.			x
4.A.2.b.2	Thinking Creatively	4.A.2.b.2.I13	Design materials or devices.			x
4.A.2.b.2	Thinking Creatively	4.A.2.b.2.I14	Design industrial systems or equipment.			x
4.A.2.b.2	Thinking Creatively	4.A.2.b.2.I15	Develop educational programs, plans, or procedures.			x
4.A.2.b.2	Thinking Creatively	4.A.2.b.2.I16	Develop systems or practices to mitigate or resolve environmental problems.			x
4.A.2.b.2	Thinking Creatively	4.A.2.b.2.I17	Develop public or community health programs.	x		x
4.A.2.b.2	Thinking Creatively	4.A.2.b.2.I18	Create visual designs or displays.			x
4.A.2.b.2	Thinking Creatively	4.A.2.b.2.I19	Develop contingency or emergency response plans.			x
4.A.2.b.2	Thinking Creatively	4.A.2.b.2.I20	Develop sustainable organizational or business policies or practices.			x
4.A.2.b.2	Thinking Creatively	4.A.2.b.2.I21	Develop models of systems, processes, or products.			x
4.A.2.b.2	Thinking Creatively	4.A.2.b.2.I22	Develop news, entertainment, or artistic content.			x
4.A.2.b.2	Thinking Creatively	4.A.2.b.2.I23	Develop research plans or methodologies.			x
4.A.2.b.2	Thinking Creatively	4.A.2.b.2.I24	Design electrical or electronic systems or equipment.			x
4.A.2.b.2	Thinking Creatively	4.A.2.b.2.I25	Create artistic designs or performances.	x		x
4.A.2.b.2	Thinking Creatively	4.A.2.b.2.I26	Develop scientific or mathematical theories or models.			x
4.A.2.b.2	Thinking Creatively	4.A.2.b.2.I27	Develop organizational or program goals or objectives.			x
4.A.2.b.3	Updating and Using Relevant Knowledge	4.A.2.b.3.I01	Maintain current knowledge in area of expertise.
4.A.2.b.4	Developing Objectives and Strategies	4.A.2.b.4.I01	Develop organizational policies, systems, or processes.
4.A.2.b.4	Developing Objectives and Strategies	4.A.2.b.4.I02	Draft legislation or regulations.
4.A.2.b.4	Developing Objectives and Strategies	4.A.2.b.4.I03	Develop operational or technical procedures or standards.
4.A.2.b.5	Scheduling Work and Activities	4.A.2.b.5.I01	Prepare schedules for services or facilities.
4.A.2.b.5	Scheduling Work and Activities	4.A.2.b.5.I02	Schedule operational activities.
4.A.2.b.5	Scheduling Work and Activities	4.A.2.b.5.I03	Schedule appointments.	x
4.A.2.b.6	Organizing, Planning, and Prioritizing Work	4.A.2.b.6.I01	Plan events or programs.	x
4.A.2.b.6	Organizing, Planning, and Prioritizing Work	4.A.2.b.6.I02	Plan work activities.
4.A.3.a.1	Performing General Physical Activities	4.A.3.a.1.I01	Prepare mixtures or solutions.
4.A.3.a.1	Performing General Physical Activities	4.A.3.a.1.I02	Protect people or property from threats such as fires or flooding.
4.A.3.a.1	Performing General Physical Activities	4.A.3.a.1.I03	Clean tools, equipment, facilities, or work areas.
4.A.3.a.1	Performing General Physical Activities	4.A.3.a.1.I04	Set up protective structures or coverings near work areas.
4.A.3.a.1	Performing General Physical Activities	4.A.3.a.1.I05	Dispose of waste or debris.
4.A.3.a.1	Performing General Physical Activities	4.A.3.a.1.I06	Load products, materials, or equipment for transportation or further processing.
4.A.3.a.1	Performing General Physical Activities	4.A.3.a.1.I07	Perform general construction or extraction activities.
4.A.3.a.1	Performing General Physical Activities	4.A.3.a.1.I08	Clean workpieces, finished products, or other objects.
4.A.3.a.1	Performing General Physical Activities	4.A.3.a.1.I09	Clean medical equipment or facilities.
4.A.3.a.1	Performing General Physical Activities	4.A.3.a.1.I10	Move materials, equipment, or supplies.
4.A.3.a.1	Performing General Physical Activities	4.A.3.a.1.I11	Maintain safety or security.
4.A.3.a.1	Performing General Physical Activities	4.A.3.a.1.I12	Escort others.	x
4.A.3.a.1	Performing General Physical Activities	4.A.3.a.1.I13	Transport patients or clients.
4.A.3.a.1	Performing General Physical Activities	4.A.3.a.1.I14	Climb equipment or structures.
4.A.3.a.1	Performing General Physical Activities	4.A.3.a.1.I15	Provide food or beverage services.
4.A.3.a.1	Performing General Physical Activities	4.A.3.a.1.I16	Perform athletic activities for fitness, competition, or artistic purposes.
4.A.3.a.1	Performing General Physical Activities	4.A.3.a.1.I17	Perform agricultural activities.
4.A.3.a.2	Handling and Moving Objects	4.A.3.a.2.I01	Build structures.
4.A.3.a.2	Handling and Moving Objects	4.A.3.a.2.I02	Collect samples of products or materials.
4.A.3.a.2	Handling and Moving Objects	4.A.3.a.2.I03	Prepare foods or beverages.
4.A.3.a.2	Handling and Moving Objects	4.A.3.a.2.I04	Assemble equipment or components.
4.A.3.a.2	Handling and Moving Objects	4.A.3.a.2.I05	Sew garments or materials.
4.A.3.a.2	Handling and Moving Objects	4.A.3.a.2.I06	Position workpieces or materials on equipment.
4.A.3.a.2	Handling and Moving Objects	4.A.3.a.2.I07	Shape materials to create products.
4.A.3.a.2	Handling and Moving Objects	4.A.3.a.2.I08	Arrange displays or decorations.
4.A.3.a.2	Handling and Moving Objects	4.A.3.a.2.I09	Adjust equipment to ensure adequate performance.
4.A.3.a.2	Handling and Moving Objects	4.A.3.a.2.I10	Train animals.
4.A.3.a.2	Handling and Moving Objects	4.A.3.a.2.I11	Prepare medical equipment or work areas for use.
4.A.3.a.2	Handling and Moving Objects	4.A.3.a.2.I12	Cut materials.
4.A.3.a.2	Handling and Moving Objects	4.A.3.a.2.I13	Prepare industrial materials for processing or use.
4.A.3.a.2	Handling and Moving Objects	4.A.3.a.2.I14	Cut trees or other vegetation.
4.A.3.a.2	Handling and Moving Objects	4.A.3.a.2.I15	Smooth surfaces of objects or equipment.
4.A.3.a.2	Handling and Moving Objects	4.A.3.a.2.I16	Install energy or heating equipment.
4.A.3.a.2	Handling and Moving Objects	4.A.3.a.2.I17	Fabricate medical devices.
4.A.3.a.2	Handling and Moving Objects	4.A.3.a.2.I18	Direct vehicle traffic.
4.A.3.a.2	Handling and Moving Objects	4.A.3.a.2.I19	Disassemble equipment.
4.A.3.a.2	Handling and Moving Objects	4.A.3.a.2.I20	Install commercial or production equipment.
4.A.3.a.2	Handling and Moving Objects	4.A.3.a.2.I21	Apply hygienic or cosmetic agents to skin or hair.
4.A.3.a.2	Handling and Moving Objects	4.A.3.a.2.I22	Position tools or equipment.
4.A.3.a.2	Handling and Moving Objects	4.A.3.a.2.I23	Tend watercraft.
4.A.3.a.2	Handling and Moving Objects	4.A.3.a.2.I24	Adjust medical equipment to ensure adequate performance.
4.A.3.a.2	Handling and Moving Objects	4.A.3.a.2.I25	Engrave objects.
4.A.3.a.2	Handling and Moving Objects	4.A.3.a.2.I26	Embalm corpses.
4.A.3.a.2	Handling and Moving Objects	4.A.3.a.2.I27	Fabricate devices or components.
4.A.3.a.2	Handling and Moving Objects	4.A.3.a.2.I28	Create decorative objects or parts of objects.
4.A.3.a.2	Handling and Moving Objects	4.A.3.a.2.I29	Process animal carcasses.
4.A.3.a.2	Handling and Moving Objects	4.A.3.a.2.I30	Drill holes in earth or materials.
4.A.3.a.2	Handling and Moving Objects	4.A.3.a.2.I31	Groom or style hair.
4.A.3.a.2	Handling and Moving Objects	4.A.3.a.2.I32	Set up classrooms, facilities, educational materials, or equipment.
4.A.3.a.2	Handling and Moving Objects	4.A.3.a.2.I33	Apply protective solutions or coatings.
4.A.3.a.2	Handling and Moving Objects	4.A.3.a.2.I34	Connect components or supply lines to equipment or tools.
4.A.3.a.2	Handling and Moving Objects	4.A.3.a.2.I35	Join parts using soldering, welding, or brazing techniques.
4.A.3.a.2	Handling and Moving Objects	4.A.3.a.2.I36	Assemble products or work aids.
4.A.3.a.2	Handling and Moving Objects	4.A.3.a.2.I37	Stock supplies or products.
4.A.3.a.2	Handling and Moving Objects	4.A.3.a.2.I38	Collect environmental or biological samples.
4.A.3.a.2	Handling and Moving Objects	4.A.3.a.2.I39	Apply materials to fill gaps or imperfections.
4.A.3.a.2	Handling and Moving Objects	4.A.3.a.2.I40	Remove workpieces from production equipment.
4.A.3.a.2	Handling and Moving Objects	4.A.3.a.2.I41	Position materials or components for assembly.
4.A.3.a.2	Handling and Moving Objects	4.A.3.a.2.I42	Package objects.
4.A.3.a.2	Handling and Moving Objects	4.A.3.a.2.I43	Install plumbing or piping equipment or systems.
4.A.3.a.2	Handling and Moving Objects	4.A.3.a.2.I44	Hunt animals.
4.A.3.a.2	Handling and Moving Objects	4.A.3.a.2.I45	Apply decorative finishes.
4.A.3.a.2	Handling and Moving Objects	4.A.3.a.2.I46	Set up equipment.
4.A.3.a.2	Handling and Moving Objects	4.A.3.a.2.I47	Prepare specimens or materials for testing.
4.A.3.a.3	Controlling Machines and Processes	4.A.3.a.3.I01	Operate office equipment.
4.A.3.a.3	Controlling Machines and Processes	4.A.3.a.3.I02	Operate pumping systems or equipment.
4.A.3.a.3	Controlling Machines and Processes	4.A.3.a.3.I03	Operate construction or excavation equipment.
4.A.3.a.3	Controlling Machines and Processes	4.A.3.a.3.I04	Operate medical equipment.
4.A.3.a.3	Controlling Machines and Processes	4.A.3.a.3.I05	Operate audiovisual or related equipment.
4.A.3.a.3	Controlling Machines and Processes	4.A.3.a.3.I06	Operate industrial processing or production equipment.
4.A.3.a.3	Controlling Machines and Processes	4.A.3.a.3.I07	Operate energy production or distribution equipment.
4.A.3.a.3	Controlling Machines and Processes	4.A.3.a.3.I08	Operate lifting or moving equipment.
4.A.3.a.3	Controlling Machines and Processes	4.A.3.a.3.I09	Operate laboratory or field equipment.
4.A.3.a.3	Controlling Machines and Processes	4.A.3.a.3.I10	Operate communications equipment or systems.
4.A.3.a.3	Controlling Machines and Processes	4.A.3.a.3.I11	Operate agricultural or forestry equipment.
4.A.3.a.3	Controlling Machines and Processes	4.A.3.a.3.I12	Operate cutting or grinding equipment.
4.A.3.a.4	Operating Vehicles, Mechanized Devices, or Equipment	4.A.3.a.4.I01	Operate transportation equipment or vehicles.
4.A.3.b.1	Interacting With Computers	4.A.3.b.1.I01	Program computer systems or production equipment.
4.A.3.b.1	Interacting With Computers	4.A.3.b.1.I02	Implement security measures for computer or information systems.
4.A.3.b.1	Interacting With Computers	4.A.3.b.1.I03	Set up computer systems, networks, or other information systems.
4.A.3.b.1	Interacting With Computers	4.A.3.b.1.I04	Resolve computer problems.
4.A.3.b.1	Interacting With Computers	4.A.3.b.1.I05	Operate computer systems or computerized equipment.
4.A.3.b.1	Interacting With Computers	4.A.3.b.1.I06	Process digital or online data.
4.A.3.b.4	Repairing and Maintaining Mechanical Equipment	4.A.3.b.4.I01	Maintain facilities or equipment.
4.A.3.b.4	Repairing and Maintaining Mechanical Equipment	4.A.3.b.4.I02	Maintain tools or equipment.
4.A.3.b.4	Repairing and Maintaining Mechanical Equipment	4.A.3.b.4.I03	Repair electrical or electronic equipment.
4.A.3.b.4	Repairing and Maintaining Mechanical Equipment	4.A.3.b.4.I04	Maintain electronic, computer, or other technical equipment.
4.A.3.b.4	Repairing and Maintaining Mechanical Equipment	4.A.3.b.4.I05	Repair workpieces or products.
4.A.3.b.4	Repairing and Maintaining Mechanical Equipment	4.A.3.b.4.I06	Repair tools or equipment.
4.A.3.b.4	Repairing and Maintaining Mechanical Equipment	4.A.3.b.4.I07	Repair vehicle components.
4.A.3.b.4	Repairing and Maintaining Mechanical Equipment	4.A.3.b.4.I08	Maintain vehicles in working condition.
4.A.3.b.4	Repairing and Maintaining Mechanical Equipment	4.A.3.b.4.I09	Maintain medical equipment or instruments.
4.A.3.b.6	Documenting/Recording Information	4.A.3.b.6.I01	Prepare financial documents, reports, or budgets.
4.A.3.b.6	Documenting/Recording Information	4.A.3.b.6.I02	Record information about legal matters.
4.A.3.b.6	Documenting/Recording Information	4.A.3.b.6.I03	Present research or technical information.
4.A.3.b.6	Documenting/Recording Information	4.A.3.b.6.I04	Record information about environmental conditions.
4.A.3.b.6	Documenting/Recording Information	4.A.3.b.6.I05	Record images with photographic or audiovisual equipment.
4.A.3.b.6	Documenting/Recording Information	4.A.3.b.6.I06	Prepare health or medical documents.
4.A.3.b.6	Documenting/Recording Information	4.A.3.b.6.I07	Prepare proposals or grant applications.
4.A.3.b.6	Documenting/Recording Information	4.A.3.b.6.I08	Maintain operational records.
4.A.3.b.6	Documenting/Recording Information	4.A.3.b.6.I09	Document technical designs, procedures, or activities.
4.A.3.b.6	Documenting/Recording Information	4.A.3.b.6.I10	Maintain sales or financial records.
4.A.3.b.6	Documenting/Recording Information	4.A.3.b.6.I11	Maintain health or medical records.
4.A.3.b.6	Documenting/Recording Information	4.A.3.b.6.I12	Prepare informational or instructional materials.
4.A.3.b.6	Documenting/Recording Information	4.A.3.b.6.I13	Prepare documentation for contracts, applications, or permits.
4.A.3.b.6	Documenting/Recording Information	4.A.3.b.6.I14	Prepare legal or regulatory documents.
4.A.3.b.6	Documenting/Recording Information	4.A.3.b.6.I15	Prepare reports of operational or procedural activities.
4.A.3.b.6	Documenting/Recording Information	4.A.3.b.6.I16	Write material for artistic or commercial purposes.
4.A.4.a.1	Interpreting the Meaning of Information for Others	4.A.4.a.1.I01	Explain technical details of products or services.	x	x
4.A.4.a.1	Interpreting the Meaning of Information for Others	4.A.4.a.1.I02	Explain regulations, policies, or procedures.	x	x
4.A.4.a.1	Interpreting the Meaning of Information for Others	4.A.4.a.1.I03	Interpret language, cultural, or religious information for others.	x	x
4.A.4.a.1	Interpreting the Meaning of Information for Others	4.A.4.a.1.I04	Explain financial information.	x	x
4.A.4.a.1	Interpreting the Meaning of Information for Others	4.A.4.a.1.I05	Explain medical information to patients or family members.	x	x
4.A.4.a.2	Communicating with Supervisors, Peers, or Subordinates	4.A.4.a.2.I01	Communicate environmental or sustainability information.	x	x
4.A.4.a.2	Communicating with Supervisors, Peers, or Subordinates	4.A.4.a.2.I02	Assist scientists, scholars, or technical specialists with projects or research.	x	x
4.A.4.a.2	Communicating with Supervisors, Peers, or Subordinates	4.A.4.a.2.I03	Communicate with others about operational plans or activities.	x	x
4.A.4.a.2	Communicating with Supervisors, Peers, or Subordinates	4.A.4.a.2.I04	Coordinate with others to resolve problems.	x	x
4.A.4.a.2	Communicating with Supervisors, Peers, or Subordinates	4.A.4.a.2.I05	Confer with healthcare or other professionals about patient care.	x	x
4.A.4.a.2	Communicating with Supervisors, Peers, or Subordinates	4.A.4.a.2.I06	Communicate with others about business strategies.	x	x
4.A.4.a.2	Communicating with Supervisors, Peers, or Subordinates	4.A.4.a.2.I07	Collaborate in the development of educational programs.	x	x
4.A.4.a.2	Communicating with Supervisors, Peers, or Subordinates	4.A.4.a.2.I08	Notify others of emergencies or problems.	x	x
4.A.4.a.2	Communicating with Supervisors, Peers, or Subordinates	4.A.4.a.2.I09	Communicate with others about specifications or project details.	x	x
4.A.4.a.2	Communicating with Supervisors, Peers, or Subordinates	4.A.4.a.2.I10	Signal others to coordinate work activities.	x	x
4.A.4.a.2	Communicating with Supervisors, Peers, or Subordinates	4.A.4.a.2.I11	Coordinate activities with clients, agencies, or organizations.	x	x
4.A.4.a.2	Communicating with Supervisors, Peers, or Subordinates	4.A.4.a.2.I12	Discuss legal matters with clients, disputants, or legal professionals or staff.	x	x
4.A.4.a.2	Communicating with Supervisors, Peers, or Subordinates	4.A.4.a.2.I13	Confer with clients to determine needs or order specifications.	x	x
4.A.4.a.3	Communicating with Persons Outside Organization	4.A.4.a.3.I01	Present information in legal proceedings.	x	x
4.A.4.a.3	Communicating with Persons Outside Organization	4.A.4.a.3.I02	Provide information or assistance to the public.	x	x
4.A.4.a.3	Communicating with Persons Outside Organization	4.A.4.a.3.I03	Provide information to guests, clients, or customers.	x	x
4.A.4.a.4	Establishing and Maintaining Interpersonal Relationships	4.A.4.a.4.I01	Develop professional relationships or networks.	x	x
4.A.4.a.5	Assisting and Caring for Others	4.A.4.a.5.I01	Assist others to access additional services or resources.	x
4.A.4.a.5	Assisting and Caring for Others	4.A.4.a.5.I02	Administer therapeutic treatments.
4.A.4.a.5	Assisting and Caring for Others	4.A.4.a.5.I03	Administer basic health care or medical treatments.
4.A.4.a.5	Assisting and Caring for Others	4.A.4.a.5.I04	Care for plants or animals.
4.A.4.a.5	Assisting and Caring for Others	4.A.4.a.5.I05	Intervene in crisis situations or emergencies.	x
4.A.4.a.5	Assisting and Caring for Others	4.A.4.a.5.I06	Fit assistive devices to patients or clients.
4.A.4.a.5	Assisting and Caring for Others	4.A.4.a.5.I07	Administer emergency medical treatment.
4.A.4.a.5	Assisting and Caring for Others	4.A.4.a.5.I08	Assist individuals with paperwork.	x
4.A.4.a.5	Assisting and Caring for Others	4.A.4.a.5.I09	Assist individuals with special needs.	x
4.A.4.a.5	Assisting and Caring for Others	4.A.4.a.5.I10	Provide general assistance to others, such as customers, patrons, or motorists.	x
4.A.4.a.5	Assisting and Caring for Others	4.A.4.a.5.I11	Assist healthcare practitioners during medical procedures.
4.A.4.a.5	Assisting and Caring for Others	4.A.4.a.5.I12	Treat injuries, illnesses, or diseases.	x
4.A.4.a.6	Selling or Influencing Others	4.A.4.a.6.I01	Advocate for individual or community needs.	x	x
4.A.4.a.6	Selling or Influencing Others	4.A.4.a.6.I02	Sell products or services.	x	x
4.A.4.a.6	Selling or Influencing Others	4.A.4.a.6.I03	Promote products, services, or programs.	x	x
4.A.4.a.7	Resolving Conflicts and Negotiating with Others	4.A.4.a.7.I01	Mediate disputes.	x	x
4.A.4.a.7	Resolving Conflicts and Negotiating with Others	4.A.4.a.7.I02	Negotiate contracts or agreements.	x	x
4.A.4.a.7	Resolving Conflicts and Negotiating with Others	4.A.4.a.7.I03	Resolve personnel or operational problems.	x	x
4.A.4.a.8	Performing for or Working Directly with the Public	4.A.4.a.8.I01	Present arts or entertainment performances.	x	x
4.A.4.a.8	Performing for or Working Directly with the Public	4.A.4.a.8.I02	Conduct amusement or gaming activities.	x	x
4.A.4.a.8	Performing for or Working Directly with the Public	4.A.4.a.8.I03	Respond to customer problems or inquiries.	x	x
4.A.4.b.3	Training and Teaching Others	4.A.4.b.3.I01	Teach life skills.	x	x
4.A.4.b.3	Training and Teaching Others	4.A.4.b.3.I02	Teach academic or vocational subjects.	x	x
4.A.4.b.3	Training and Teaching Others	4.A.4.b.3.I03	Teach safety procedures or standards to others.	x	x
4.A.4.b.3	Training and Teaching Others	4.A.4.b.3.I04	Train others on operational or work procedures.	x	x
4.A.4.b.3	Training and Teaching Others	4.A.4.b.3.I05	Train others to use equipment or products.	x	x
4.A.4.b.3	Training and Teaching Others	4.A.4.b.3.I06	Train others on health or medical topics.	x	x
4.A.4.b.4	Guiding, Directing, and Motivating Subordinates	4.A.4.b.4.I01	Supervise personnel activities.	x	x
4.A.4.b.4	Guiding, Directing, and Motivating Subordinates	4.A.4.b.4.I02	Serve on organizational committees.	x	x
4.A.4.b.4	Guiding, Directing, and Motivating Subordinates	4.A.4.b.4.I03	Coordinate artistic or entertainment activities.	x	x
4.A.4.b.4	Guiding, Directing, and Motivating Subordinates	4.A.4.b.4.I04	Manage agricultural or forestry operations.	x	x
4.A.4.b.4	Guiding, Directing, and Motivating Subordinates	4.A.4.b.4.I05	Supervise activities in correctional facilities.	x	x
4.A.4.b.4	Guiding, Directing, and Motivating Subordinates	4.A.4.b.4.I06	Direct scientific or technical activities.	x	x
4.A.4.b.4	Guiding, Directing, and Motivating Subordinates	4.A.4.b.4.I07	Manage human resources activities.	x	x
4.A.4.b.4	Guiding, Directing, and Motivating Subordinates	4.A.4.b.4.I08	Manage control systems or activities.		x
4.A.4.b.4	Guiding, Directing, and Motivating Subordinates	4.A.4.b.4.I09	Manage budgets or finances.		x
4.A.4.b.4	Guiding, Directing, and Motivating Subordinates	4.A.4.b.4.I10	Direct construction or extraction activities.	x	x
4.A.4.b.4	Guiding, Directing, and Motivating Subordinates	4.A.4.b.4.I11	Coordinate group, community, or public activities.	x	x
4.A.4.b.4	Guiding, Directing, and Motivating Subordinates	4.A.4.b.4.I12	Direct organizational operations, activities, or procedures.	x	x
4.A.4.b.4	Guiding, Directing, and Motivating Subordinates	4.A.4.b.4.I13	Assign work to others.	x	x
4.A.4.b.4	Guiding, Directing, and Motivating Subordinates	4.A.4.b.4.I14	Coordinate regulatory compliance activities.		x
4.A.4.b.4	Guiding, Directing, and Motivating Subordinates	4.A.4.b.4.I15	Direct security or safety activities or operations.	x	x
4.A.4.b.4	Guiding, Directing, and Motivating Subordinates	4.A.4.b.4.I16	Direct legal activities.	x	x
4.A.4.b.5	Coaching and Developing Others	4.A.4.b.5.I01	Coach others.	x	x
4.A.4.b.5	Coaching and Developing Others	4.A.4.b.5.I02	Provide support or encouragement to others.	x	x
4.A.4.b.6	Provide Consultation and Advice to Others	4.A.4.b.6.I01	Advise patients or clients on medical issues.	x	x
4.A.4.b.6	Provide Consultation and Advice to Others	4.A.4.b.6.I02	Advise others on products or services.	x	x
4.A.4.b.6	Provide Consultation and Advice to Others	4.A.4.b.6.I03	Advise others on environmental sustainability or green practices.	x	x
4.A.4.b.6	Provide Consultation and Advice to Others	4.A.4.b.6.I04	Advise others on the design or use of technologies.	x	x
4.A.4.b.6	Provide Consultation and Advice to Others	4.A.4.b.6.I05	Advise others on business or operational matters.	x	x
4.A.4.b.6	Provide Consultation and Advice to Others	4.A.4.b.6.I06	Advise others on healthcare or wellness issues.	x	x
4.A.4.b.6	Provide Consultation and Advice to Others	4.A.4.b.6.I07	Advise others on educational or vocational matters.	x	x
4.A.4.b.6	Provide Consultation and Advice to Others	4.A.4.b.6.I08	Advise others on legal or regulatory matters.	x	x
4.A.4.b.6	Provide Consultation and Advice to Others	4.A.4.b.6.I09	Advise others on workplace health or safety issues.	x	x
4.A.4.b.6	Provide Consultation and Advice to Others	4.A.4.b.6.I10	Counsel others about personal matters.	x	x
4.A.4.b.6	Provide Consultation and Advice to Others	4.A.4.b.6.I11	Advise others on financial matters.	x	x
4.A.4.c.1	Performing Administrative Activities	4.A.4.c.1.I01	Perform administrative or clerical activities.
4.A.4.c.1	Performing Administrative Activities	4.A.4.c.1.I02	Perform court-related or other legal administrative activities.
4.A.4.c.1	Performing Administrative Activities	4.A.4.c.1.I03	Execute financial transactions.
4.A.4.c.1	Performing Administrative Activities	4.A.4.c.1.I04	Issue documentation.
4.A.4.c.1	Performing Administrative Activities	4.A.4.c.1.I05	Process shipments or mail.
4.A.4.c.1	Performing Administrative Activities	4.A.4.c.1.I06	Process forensic or legal evidence.
4.A.4.c.2	Staffing Organizational Units	4.A.4.c.2.I01	Perform recruiting or hiring activities.	x
4.A.4.c.2	Staffing Organizational Units	4.A.4.c.2.I02	Perform human resources activities.	x
4.A.4.c.3	Monitoring and Controlling Resources	4.A.4.c.3.I01	Replenish inventories of materials, equipment, or products.
4.A.4.c.3	Monitoring and Controlling Resources	4.A.4.c.3.I02	Order medical tests or procedures.
4.A.4.c.3	Monitoring and Controlling Resources	4.A.4.c.3.I03	Distribute materials, supplies, or resources.	x
4.A.4.c.3	Monitoring and Controlling Resources	4.A.4.c.3.I04	Collect fares or payments.	x
4.A.4.c.3	Monitoring and Controlling Resources	4.A.4.c.3.I05	Purchase goods or services.
4.A.4.c.3	Monitoring and Controlling Resources	4.A.4.c.3.I06	Prescribe medical treatments or devices.	x
4.A.4.c.3	Monitoring and Controlling Resources	4.A.4.c.3.I07	Monitor resources or inventories.
